# Prostaglandin E<sub>2</sub> Induction during Mouse Adenovirus Type 1 Respiratory Infection Regulates Inflammatory Mediator Generation but Does Not Affect Viral Pathogenesis

Mary K. McCarthy<sup>2</sup>, Rachael E. Levine<sup>1</sup>, Megan C. Procario<sup>1</sup>, Peter J. McDonnell<sup>1</sup>, Lingqiao Zhu<sup>2</sup>, Peter Mancuso<sup>4</sup>, Leslie J. Crofford<sup>5</sup>, David M. Aronoff<sup>2,3</sup>, Jason B. Weinberg<sup>1,2\*</sup>

**1** Department of Pediatrics and Communicable Diseases, University of Michigan, Ann Arbor, Michigan, United States of America, **2** Department of Microbiology and Immunology, University of Michigan, Ann Arbor, Michigan, United States of America, **3** Department of Internal Medicine, University of Michigan, Ann Arbor, Michigan, United States of America, **4** Department of Environmental Health Sciences, University of Michigan, Ann Arbor, Michigan, United States of America, **5** Department of Internal Medicine, Vanderbilt University, Nashville, Tennessee, United States of America

## Abstract

Respiratory viruses cause substantial disease and are a significant healthcare burden. Virus-induced inflammation can be detrimental to the host, causing symptoms during acute infection and leading to damage that contributes to long-term residual lung disease. Prostaglandin E<sub>2</sub> (PGE<sub>2</sub>) is a lipid mediator that is increased in response to many viral infections, and inhibition of PGE<sub>2</sub> production during respiratory viral infection often leads to a decreased inflammatory response. We tested the hypothesis that PGE<sub>2</sub> promotes inflammatory responses to mouse adenovirus type 1 (MAV-1) respiratory infection. Acute MAV-1 infection increased COX-2 expression and PGE<sub>2</sub> production in wild type mice. Deficiency of the E prostanoid 2 receptor had no apparent effect on MAV-1 pathogenesis. Virus-induced induction of PGE<sub>2</sub>, IFN- $\gamma$ , CXCL1, and CCL5 was reduced in mice deficient in microsomal PGE synthase-1 (mPGES-1<sup>-/-</sup> mice). However, there were no differences between mPGES-1<sup>+/+</sup> and mPGES-1<sup>-/-</sup> mice in viral replication, recruitment of leukocytes to airways or lung inflammation. Infection of both mPGES-1<sup>+/+</sup> and mPGES-1<sup>-/-</sup> mice led to protection against reinfection. Thus, while PGE<sub>2</sub> promotes the expression of a variety of cytokines in response to acute MAV-1 infection, PGE<sub>2</sub> synthesis does not appear to be essential for generating pulmonary immunity.

**Citation:** McCarthy MK, Levine RE, Procario MC, McDonnell PJ, Zhu L, et al. (2013) Prostaglandin E<sub>2</sub> Induction during Mouse Adenovirus Type 1 Respiratory Infection Regulates Inflammatory Mediator Generation but Does Not Affect Viral Pathogenesis. PLoS ONE 8(10): e77628. doi:10.1371/journal.pone.0077628

**Editor:** Jane C. Deng, University of California Los Angeles, United States of America

**Received:** June 3, 2013; **Accepted:** September 3, 2013; **Published:** October 16, 2013

**Copyright:** © 2013 McCarthy et al. This is an open-access article distributed under the terms of the Creative Commons Attribution License, which permits unrestricted use, distribution, and reproduction in any medium, provided the original author and source are credited.

**Funding:** This research was supported by NIH grants R01 AI083334 (JBW and DMA) and R01 AR049010 (LJC), a Burroughs Wellcome Fund Investigators in the Pathogenesis of Infectious Diseases award (DMA), and a Nancy Newton Loeb Award from the University of Michigan Department of Pediatrics (JBW). The funders had no role in study design, data collection and analysis, decision to publish, or preparation of the manuscript.

**Competing interests:** The authors have declared that no competing interests exist.

\* E-mail: jbw@umich.edu

## Introduction

Eicosanoids are lipid mediators generated by the release of arachidonic acid from cell membrane phospholipids in response to diverse stimuli. Prostaglandins (PGs) are derived from the oxidation of arachidonic acid by cyclooxygenase (COX) enzymes. Modification of arachidonic acid by COX forms the unstable intermediate molecule PGH<sub>2</sub>, which is converted by specific synthases to form various PGs such as thromboxane, PGD<sub>2</sub>, PGE<sub>2</sub>, PGF<sub>2 $\alpha$</sub> , and prostacyclin (PGI<sub>2</sub>). At least three different synthases have been shown to catalyze the conversion of PGH<sub>2</sub> to PGE<sub>2</sub> *in vitro*: microsomal prostaglandin E<sub>2</sub> synthase (mPGES)-1, mPGES-2, and

cytosolic PGES (cPGES/p23) [1-3]. However, neither mPGES-2 nor cPGES is required for *in vivo* PGE<sub>2</sub> synthesis [4-6] and mPGES-1 is solely responsible for both basal and inducible PGE<sub>2</sub> levels *in vivo* [7,8].

PGE<sub>2</sub> regulates immune function in many ways that are likely to affect viral pathogenesis (reviewed in 9). For example, PGE<sub>2</sub> promotes inflammation through vasodilatory mechanisms, leading to edema and facilitating passive leukocyte recruitment. Additionally, PGE<sub>2</sub> augments production of the proinflammatory cytokine IL-6 by leukocytes [10] and airway epithelial cells [11]. In regard to adaptive immunity, PGE<sub>2</sub> exerts an immunosuppressive effect at high concentrations by inhibiting production of the Th1 cytokines interferon (IFN)- $\gamma$  and IL-12

[12,13]. However, nanomolar concentrations of PGE<sub>2</sub> enhance Th1 cytokine secretion and differentiation *in vivo* [14,15]. PGE<sub>2</sub> plays an important role in optimal antibody synthesis. COX inhibitors suppress antibody production in activated human B lymphocytes [16,17], and PGE<sub>2</sub> can act on uncommitted B lymphocytes to promote isotype switching to IgE or IgG1 [18-20]. PGE<sub>2</sub> production increases *in vitro* and *in vivo* in response to many respiratory viruses, including respiratory syncytial virus (RSV) [21-24], influenza [25-27], human cytomegalovirus [28] and rhinovirus [29]. During RSV or influenza infection, pharmacologic inhibition of COX enzymes or a genetic deficiency of COX-2 decreases virus induction of pro-inflammatory cytokine production and pulmonary inflammation [22,30].

Adenoviruses are non-enveloped double-stranded DNA viruses that are common causes of respiratory infection [31]. HAdV-5 and recombinant HAdV-5-based vectors induce COX-2 expression and PGE<sub>2</sub> release in murine fibroblasts [32] and in human primary synovial fibroblasts [33] *in vitro*, respectively. However, little else is known about the role of PGE<sub>2</sub> in the pathogenesis of adenoviruses or other viruses that commonly cause respiratory infection. Since species-specificity of adenoviruses complicates animal studies with a human adenovirus, we previously established mouse adenovirus type 1 (MAV-1, also known as MAdV-1) as a model to study the pathogenesis of adenovirus respiratory infection in the natural host of the virus [34-40]. Antibodies have a crucial role in preventing severe disseminated MAV-1 infection. Mice lacking B cells or Bruton's tyrosine kinase (Btk) have increased susceptibility to MAV-1, and antiserum from immune Btk<sup>+/+</sup> mice protects Btk<sup>-/-</sup> mice [41]. T cells cause acute immunopathology and are required for long-term host survival following intraperitoneal (i.p.) MAV-1 infection. We previously demonstrated that lung viral loads in mice rechallenged with MAV-1 28 days following primary infection remain at or below the limit of detection [35], indicating that adaptive immune responses to MAV-1 are protective.

Because previous studies of other respiratory viruses used COX-deficient animals or COX inhibition, their results could be attributed to deficiency of PGE<sub>2</sub> or other COX-derived mediators. We hypothesized that PGE<sub>2</sub> production is necessary for the appropriate coordination of inflammatory responses after adenovirus respiratory infection. To test this hypothesis, we evaluated the role of PGE<sub>2</sub> after MAV-1 respiratory infection using mice deficient in the terminal PGE<sub>2</sub> synthase, mPGES-1. Consistent with our hypothesis, induction of pro-inflammatory cytokines was reduced in mPGES-1-deficient mice following MAV-1 infection compared to mPGES-1<sup>+/+</sup> mice. However, PGE<sub>2</sub> deficiency did not affect virus-induced lung inflammation, viral replication, or the development of protective immunity in this model.

## Materials and Methods

### Ethics Statement

All animal work was conducted according to relevant national and international guidelines. All animal studies were approved

by the University of Michigan Committee on Use and Care of Animals (Protocol Number 9054).

### Mice

mPGES-1 heterozygous mice on a DBA1lac/J background [6] were originally obtained from Pfizer, Inc. (Groton, CT) and then backcrossed onto a C57BL/6 background. Homozygous mPGES-1<sup>-/-</sup> mice and homozygous wild type mPGES-1<sup>+/+</sup> mice derived from the same heterozygous mPGES-1<sup>+/-</sup> parents were bred at the University of Michigan. MHC class II deficient mice (Aβ<sup>-/-</sup>) [42] were purchased from Taconic and bred at the University of Michigan. Adult (4 to 6 weeks of age) males were used in all experiments. All mice were maintained under specific pathogen-free conditions.

### Virus and Infections

MAV-1 was grown and passaged in NIH 3T6 fibroblasts, and titers of viral stocks were determined by plaque assay on 3T6 cells as previously described [43]. Adult mice were anesthetized with ketamine and xylazine and infected intranasally (i.n.) with 10<sup>5</sup> plaque forming units (p.f.u.) of MAV-1 in 40 μl of sterile phosphate-buffered saline (PBS). Control mice were mock infected i.n. with conditioned media at an equivalent dilution in sterile PBS. Mice were euthanized by pentobarbital overdose at the indicated time points. Lungs were harvested, snap frozen in dry ice, and stored at -80°C until processed further. In separate experiments, mice received an i.p. injection of indomethacin (1.2 mg/kg in PBS) or vehicle control (DMSO similarly diluted in PBS) starting on the day of infection and then on each day thereafter.

### Histology

Lungs were harvested from a subset of mice and fixed in 10% formalin. Prior to fixation, lungs were gently inflated with PBS via the trachea to maintain lung architecture. After fixation, organs were embedded in paraffin, and 5 μm sections were obtained for histopathology. Sections were stained with hematoxylin and eosin to evaluate cellular infiltrates. All sectioning and staining was performed by the Pathology Cores for Animal Research in the University of Michigan Unit for Laboratory Management. Slides were viewed through a Laborlux 12 microscope (Leitz). Digital images were obtained with an EC3 digital imaging system (Leica Microsystems) using Leica Acquisition Suite software (Leica Microsystems). Final images were assembled using Adobe Illustrator (Adobe Systems). Adjustments to the color balance of digital images were applied in Adobe Illustrator equally to all experimental and control images.

To quantify cellular inflammation in the lungs, slides were examined in a blinded fashion to determine a pathology index as previously described [35], generating separate scores for the severity of cellular infiltrates around airway lumens and interstitial infiltrates (Table 1). Each score was multiplied by a number reflecting the extent of involvement in the lung (5% to 25% = 1, >25% to 50% = 2, >50% = 3). The final pathology index was obtained by adding together the values for cellular infiltrates around airway lumens and for interstitial infiltrates.

**Table 1.** Quantification of cellular inflammation in histologic specimens.

| Score <sup>a</sup> | Cellular Infiltrates Around Airway |                                               |
|--------------------|------------------------------------|-----------------------------------------------|
|                    | Lumens                             | Interstitial Infiltrates                      |
| 0                  | No infiltrates                     | No infiltrates                                |
| 1                  | 1 to 3 cell diameters thick        | Increased cells visible only at high power    |
| 2                  | 4 to 10 cell diameters thick       | Easily seen cellular infiltrates              |
| 3                  | >10 cell diameters thick           | Extensive consolidation by inflammatory cells |

a. A score from 0 to 3 was given for each of the two categories. The score for each category was multiplied by a number reflecting the extent of involvement in the specimen (5% to 25% = 1, >25% to 50% = 2, >50% = 3). The final pathology index score was obtained by adding together values for each category, resulting in a total score that could range from 0 to 18.

doi: 10.1371/journal.pone.0077628.t001

### Isolation of DNA and RNA

DNA was extracted from the middle lobe of the right lung using the DNeasy® Tissue Kit (Qiagen Inc.). DNA was extracted from approximately one-fifth of the spleen using the DNeasy® Tissue Kit. For DNA extraction from brain, half of each brain was homogenized using a sterile razor blade, and a portion of the homogenate was used to extract DNA using the DNeasy® Tissue Kit. Total RNA was extracted from lungs as previously described [38].

### Analysis of Viral Loads

MAV-1 viral loads were measured in organs using quantitative real-time polymerase chain reaction (qPCR) as previously described [35,38]. Primers and probe used to detect a 59-bp region of the MAV-1 E1A gene are detailed in Table 2. Five µl of extracted DNA were added to reactions containing TaqMan II Universal PCR Mix with UNG (Applied Biosystems), forward and reverse primers (each at 200 nM final concentration), and probe (200 nM final concentration) in a 25 µl reaction volume. Analysis on an ABI Prism 7300 machine (Applied Biosystems) consisted of 40 cycles of 15 s at 90°C and 60 s at 60°C. Standard curves generated using known amounts of plasmid containing the MAV-1 E1A gene were used to convert cycle threshold values for experimental samples to copy numbers of E1A DNA. Results were standardized to the nanogram (ng) amount of input DNA. Each sample was assayed in triplicate. The limit of detection of this assay is typically between 10<sup>1</sup> and 10<sup>2</sup> copies of MAV-1 genome per 100 ng input DNA.

### Analysis of Host Gene Expression

Cytokine gene expression was quantified using reverse transcriptase (RT)-qPCR. First, 2.5 µg of RNA were reverse transcribed using MMLV reverse transcriptase (Invitrogen) in 20 µl reactions according to the manufacturer's instructions. Water was added to the cDNA product to bring the total volume to 50 µl. cDNA was amplified using duplexed gene expression

**Table 2.** Primers and probes used for real-time PCR analysis.

| Target    | Oligonucleotide | Sequence (5' to 3')      |
|-----------|-----------------|--------------------------|
| MAV-1 E1A | Forward primer  | GCACTCCATGGCAGGATTCT     |
|           | Reverse primer  | GGTCGAAGCAGACGGTTCTTC    |
|           | Probe           | TACTGCCACTTCTGC          |
| IFN-γ     | Forward primer  | AAAGAGATAATCTGGCTCTGC    |
|           | Reverse primer  | GCTCTGAGACAATGAACGCT     |
| COX-1     | Forward primer  | CTTCTTAGGGAATCCCATCTG    |
|           | Reverse primer  | CTTCAGTGAGGCTGTGTTGACAAG |
| COX-2     | Forward primer  | TGACCCCAAGGCTCAAAT       |
|           | Reverse primer  | GAACCCAGGTCCTCGCTTATG    |
| TNF-α     | Forward primer  | CCACCACGCTCTTCTGTCTAC    |
|           | Reverse primer  | AGGGTCTGGGCCATAGAACT     |
| GAPDH     | Forward primer  | TGCACCACCAACTGCTTAG      |
|           | Reverse primer  | GGATGCAGGGATGATGTTTC     |

doi: 10.1371/journal.pone.0077628.t002

assays for mouse CCL5, CXCL1 and GAPDH (Applied Biosystems). Five µl of cDNA were added to reactions containing TaqMan Universal PCR Mix and 1.25 µl each of 20X gene expression assays for the target cytokine and GAPDH. Primers used to detect IFN-γ, TNF-α, COX-1, and COX-2 are described in Table 2. For these measurements, 5 µl of cDNA were added to reactions containing Power SYBR Green PCR Mix (Applied Biosystems) and forward and reverse primers (each at 200 nM final concentration) in a 25 µl reaction volume. When SYBR green was used to quantify cytokine gene expression, separate reactions were prepared with primers for mouse GAPDH (Table 2, used at 200 nM each). In all cases, RT-qPCR analysis consisted of 40 cycles of 15 s at 90°C and 60 s at 60°C. Quantification of target gene mRNA was normalized to GAPDH and expressed in arbitrary units as 2<sup>-ΔCt</sup>, where Ct is the threshold cycle and ΔCt = Ct(target) – Ct(GAPDH).

### Analysis of Inflammatory Cells in Bronchoalveolar Lavage Fluid

Mice were euthanized via pentobarbital overdose at the indicated time points. Lungs were lavaged three times with the same aliquot of 1 mL sterile PBS containing protease inhibitor (complete, Mini, EDTA-free tablets; Roche Applied Science). Cells in bronchoalveolar lavage fluid (BALF) were counted using a hemocytometer. When RNA was extracted from cells in BALF, the cells pelleted in a tabletop microcentrifuge at 17,000 x g for 10 min at 4°C and then resuspended in 0.5 mL of TRIzol® (Invitrogen). RNA was subsequently isolated according to the manufacturer's protocol.

### Analysis of Cytokine Protein in Bronchoalveolar Lavage Fluid

The remaining cells in BALF were pelleted by centrifugation and supernatant was stored at -80°C. Cytokine protein concentrations in supernatant were determined by ELISA

(DuoSet Kits, R&D Systems) according to the manufacturer's protocol.

### Lung PGE<sub>2</sub> Measurements

Lung tissue was suspended in CellLytic MT (Sigma-Aldrich) containing protease inhibitor (complete, Mini, EDTA-free tablets; Roche Applied Science) and 10 mM indomethacin (Sigma Aldrich) at a concentration of 100 mg lung tissue per 1 mL homogenization buffer. Tissue was homogenized (MagNA Lyser, Roche Applied Science) in 2 x 60 s cycles at high speed (6,000) with 90 s cooling between cycles. After homogenization, tissue was spun twice at 17,000 x g for 10 min at 4°C and supernatant was stored at -80°C until assayed. Samples were diluted in PGE<sub>2</sub> enzyme immunoassay buffer and quantity of PGE<sub>2</sub> was determined using PGE<sub>2</sub> ELISA Kit (Enzo Life Sciences) according to the manufacturer's protocol.

### Statistics

Analysis of data for statistical significance was conducted using Prism 3 for Macintosh (GraphPad Software, Incorporated). Differences between groups at multiple time points were analyzed using two-way analysis of variance (ANOVA) followed by Bonferroni's multiple comparison tests. Comparisons between two groups at a single time point were made using the Mann-Whitney rank sum test. *P* values less than 0.05 were considered statistically significant.

## Results

### Induction of COX-2 expression and PGE<sub>2</sub> production by MAV-1 *in vivo*

To investigate whether MAV-1 respiratory infection induces COX-2 expression and PGE<sub>2</sub> production *in vivo*, we infected wild-type (mPGES-1<sup>+/+</sup>) mice intranasally (i.n.) with MAV-1 and harvested bronchoalveolar lavage (BAL) cells and lung tissue at times corresponding to early infection (4 days post infection, dpi), the peak of viral replication at 7 dpi [34,35], and later times (14 and 21 dpi) corresponding to clearance of virus from the lungs. Because inflammatory stimuli, including infection with a variety of pathogens, are frequently associated with upregulated COX-2 expression [44-48], we first used reverse transcriptase quantitative real-time PCR (RT-qPCR) to measure COX-2 mRNA levels following MAV-1 infection. COX-2 mRNA was significantly increased in the lungs and BAL cells of infected mice compared to mock infected mice at 7 dpi and decreased to baseline levels seen in mock infected mice by 14 dpi (Figure 1A,B). Although it was detected in both mock infected and infected mice, COX-1 expression was not upregulated by MAV-1 infection (data not shown). PGE<sub>2</sub> concentrations measured in lung homogenates steadily increased after infection, with significantly elevated levels at 14 and 21 dpi (Figure 1C, mPGES-1<sup>+/+</sup> mice). These data demonstrate that acute MAV-1 infection increases COX-2 mRNA and induces PGE<sub>2</sub> production in the lung.

### Effects of EP2 deficiency on MAV-1 respiratory infection

The physiological effects of PGE<sub>2</sub> depend on its activation of four distinct cell membrane-associated G protein-coupled E prostanoïd (EP) receptors [49]. PGE<sub>2</sub> inhibits alveolar macrophage (AM) phagocytosis via EP2 activation and subsequent increases in cAMP [50], and PGE<sub>2</sub> also inhibits bacterial killing by AMs and reactive oxygen intermediate generation by AMs in an EP2/EP4- and cAMP-dependent manner [51]. The inhibitory effects of PGE<sub>2</sub> on host inflammatory responses have been linked to signaling through EP2 and EP4 [52], and PGE<sub>2</sub> signaling through EP2 suppresses clearance from the lungs of *Pseudomonas aeruginosa* [47] and *Streptococcus pneumoniae* [49]. To determine whether PGE<sub>2</sub> has a similar effect on control of MAV-1 infection or modulation of MAV-1-induced lung inflammation, we first studied acute MAV-1 respiratory infection in EP2-deficient (EP2<sup>-/-</sup>) mice. Following i.n. infection with MAV-1, no deaths occurred in either EP2<sup>-/-</sup> or EP2<sup>+/+</sup> controls. Lung viral loads were comparable in EP2<sup>-/-</sup> and EP2<sup>+/+</sup> mice at 7 dpi (Figure 2A), which we have previously described as the peak of viral replication in the lungs [34,35]. Viral loads were substantially less in both EP2<sup>-/-</sup> and EP2<sup>+/+</sup> mice at 14 dpi, with no significant differences between the groups at this time point.

Acute MAV-1 respiratory infection induced a moderate pneumonitis in EP2<sup>+/+</sup> mice, with the accumulation of inflammatory cells around airways and hypercellularity in alveolar walls by 7 dpi that decreased somewhat by 14 dpi (Figures 2C,D). We observed similar patterns of MAV-1-induced inflammation in the lungs of EP2<sup>-/-</sup> mice at both 7 and 14 dpi (Figures 2E,F). Pathology index scores (Table 1) quantifying lung inflammation confirmed that there was not a significant difference between EP2<sup>+/+</sup> and EP2<sup>-/-</sup> mice at either time point (Figure 2B).

### Effects of mPGES-1 deficiency on MAV-1-induced lung inflammation

It is possible that redundancy of function between EP2 and EP4, which both mediate PGE<sub>2</sub>-induced increases in cAMP, accounted for the lack of differences seen between EP2<sup>+/+</sup> and EP2<sup>-/-</sup> mice. To capture the possible contributions of PGE<sub>2</sub> to MAV-1 pathogenesis without regard to individual receptors, we used mice deficient in mPGES-1. This enzyme is responsible for the majority of the conversion of PGH<sub>2</sub> to PGE<sub>2</sub>, so mPGES-1-deficient (mPGES-1<sup>-/-</sup>) mice are almost completely PGE<sub>2</sub>-deficient (Figure 1C and refs. 7,53). This strategy also allows us to assess whether PGE<sub>2</sub> may influence MAV-1 infection via interactions with EP1 or EP3 receptors as well. Consistent with this, PGE<sub>2</sub> levels in lung homogenates from mPGES-1<sup>-/-</sup> mice were substantially lower than in mPGES-1<sup>+/+</sup> control mice and remained unchanged after MAV-1 infection (Figure 1C). We did not detect any compensatory increase in mRNA levels of mPGES-2 or cPGES in mPGES-1<sup>-/-</sup> mice compared to mPGES-1<sup>+/+</sup> controls at baseline before infection or at any time after infection (data not shown).

Decreased PGE<sub>2</sub> production is associated with decreased virus-induced cytokine production following influenza virus infection of COX-2<sup>-/-</sup> mice or mice treated with the COX-2

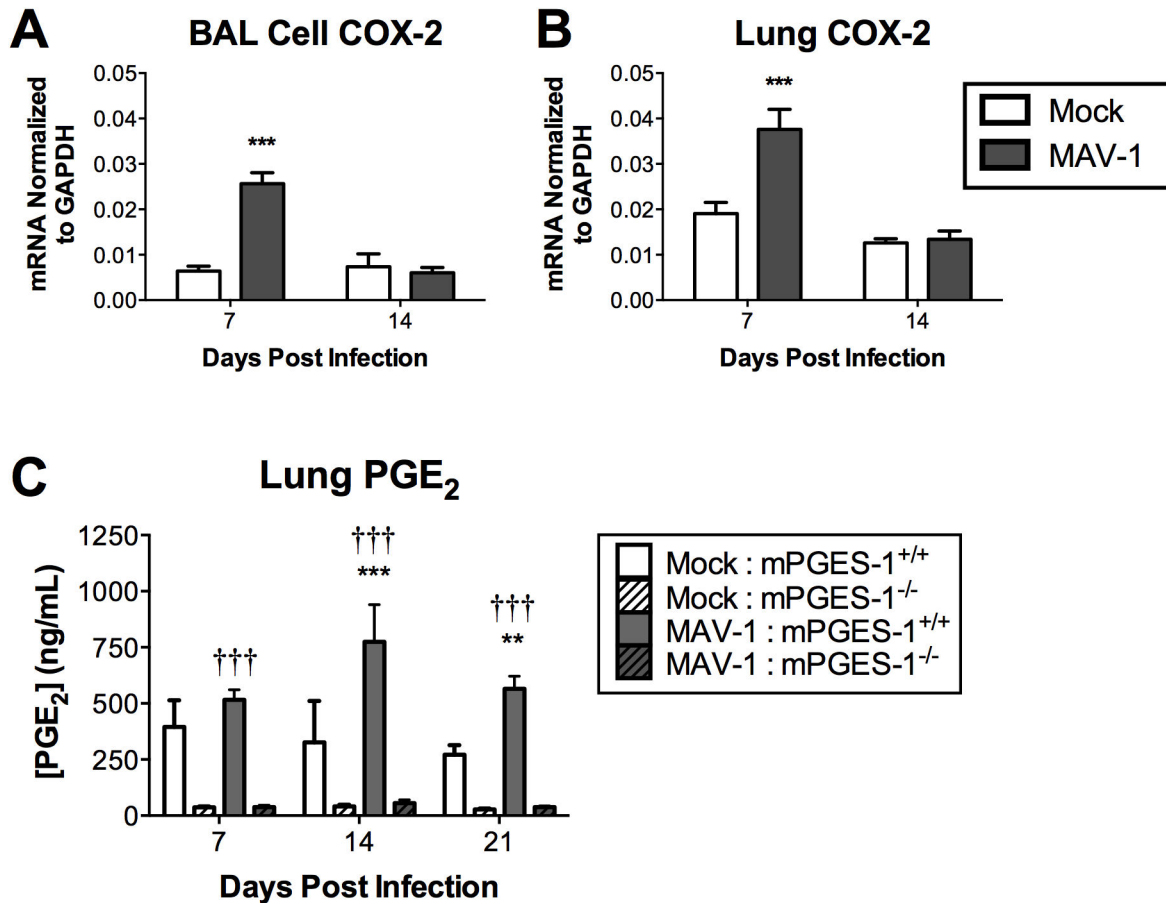

**Figure 1. Induction of lung COX-2 expression and PGE<sub>2</sub> production.** Mice were infected i.n. with MAV-1 (grey bars) or mock infected (white bars) with conditioned media. A-B) RNA was extracted from BAL cells or lungs harvested at the indicated time points and RT-qPCR was used to quantify COX-2 expression, which is expressed in arbitrary units. C) ELISA was used to quantify PGE<sub>2</sub> concentrations in lung homogenates from both mPGES-1<sup>+/+</sup> and mPGES-1<sup>-/-</sup> mice at the indicated time points. Combined data from n=8-9 (for BAL COX-2), n=5-23 (for lung COX-2) and n=3-5 (for ELISA) mice per group are presented as means ± S.E.M. Statistical comparisons were made using two-way ANOVA followed by Bonferroni's multiple comparison tests. \**P*<0.05, \*\**P*<0.01 and \*\*\**P*<0.001, comparing mock to MAV-1 for a given genotype. †††*P*< 0.001, comparing genotypes within the same condition.

doi: 10.1371/journal.pone.0077628.g001

inhibitor celecoxib [30,54]. We hypothesized that PGE<sub>2</sub> promotes virus-induced cytokine and chemokine production following MAV-1 infection. To determine whether PGE<sub>2</sub> deficiency in mPGES-1<sup>-/-</sup> mice affected MAV-1-induced cytokine responses, we measured mRNA and protein levels of cytokines and chemokines that are commonly induced by MAV-1 infection [34,35]. At 7 dpi, IFN-γ mRNA was significantly increased in lungs of infected mice compared to mock-infected mice, although induction did not differ between mPGES-1<sup>+/+</sup> and mPGES-1<sup>-/-</sup> mice (Figure 3A). MAV-1 infection induced similar increases of TNF-α mRNA in mPGES-1<sup>+/+</sup> and mPGES-1<sup>-/-</sup> mice at 7 and 14 dpi (Figure 3B). At 7 and 14 dpi, lung CCL5 mRNA was significantly increased after infection, although the magnitude of induction was similar in mPGES-1<sup>+/+</sup> and mPGES-1<sup>-/-</sup> mice (Figure 3C). The kinetics and magnitude of CXCL1 mRNA were similar in infected mPGES-1<sup>+/+</sup> and

mPGES-1<sup>-/-</sup> mice, with maximal induction occurring at 7 dpi (Figure 3D).

For each cytokine examined, peak induction of protein in BALF occurred at 7 dpi and protein levels then decreased over time, returning to baseline by 21 dpi. Peak IFN-γ protein concentrations were detected at 7 dpi in BALF from both infected mPGES-1<sup>+/+</sup> and mPGES-1<sup>-/-</sup> mice, but the amount of IFN-γ protein was significantly less in mPGES-1<sup>-/-</sup> mice than in mPGES-1<sup>+/+</sup> mice (Figure 3E). By 14 dpi, IFN-γ in both mPGES-1<sup>+/+</sup> and mPGES-1<sup>-/-</sup> mice decreased to baseline levels. We did not detect changes of IL-4 protein in BALF at any time point (data not shown), suggesting that PGE<sub>2</sub> deficiency did not result in Th2 skewing following MAV-1 infection. Concentrations of TNF-α protein in BALF were also less in infected mPGES-1<sup>-/-</sup> mice than in mPGES-1<sup>+/+</sup> mice at 7 dpi, although this difference was not statistically significant (Figure 3F). TNF-α protein concentrations in BALF returned to

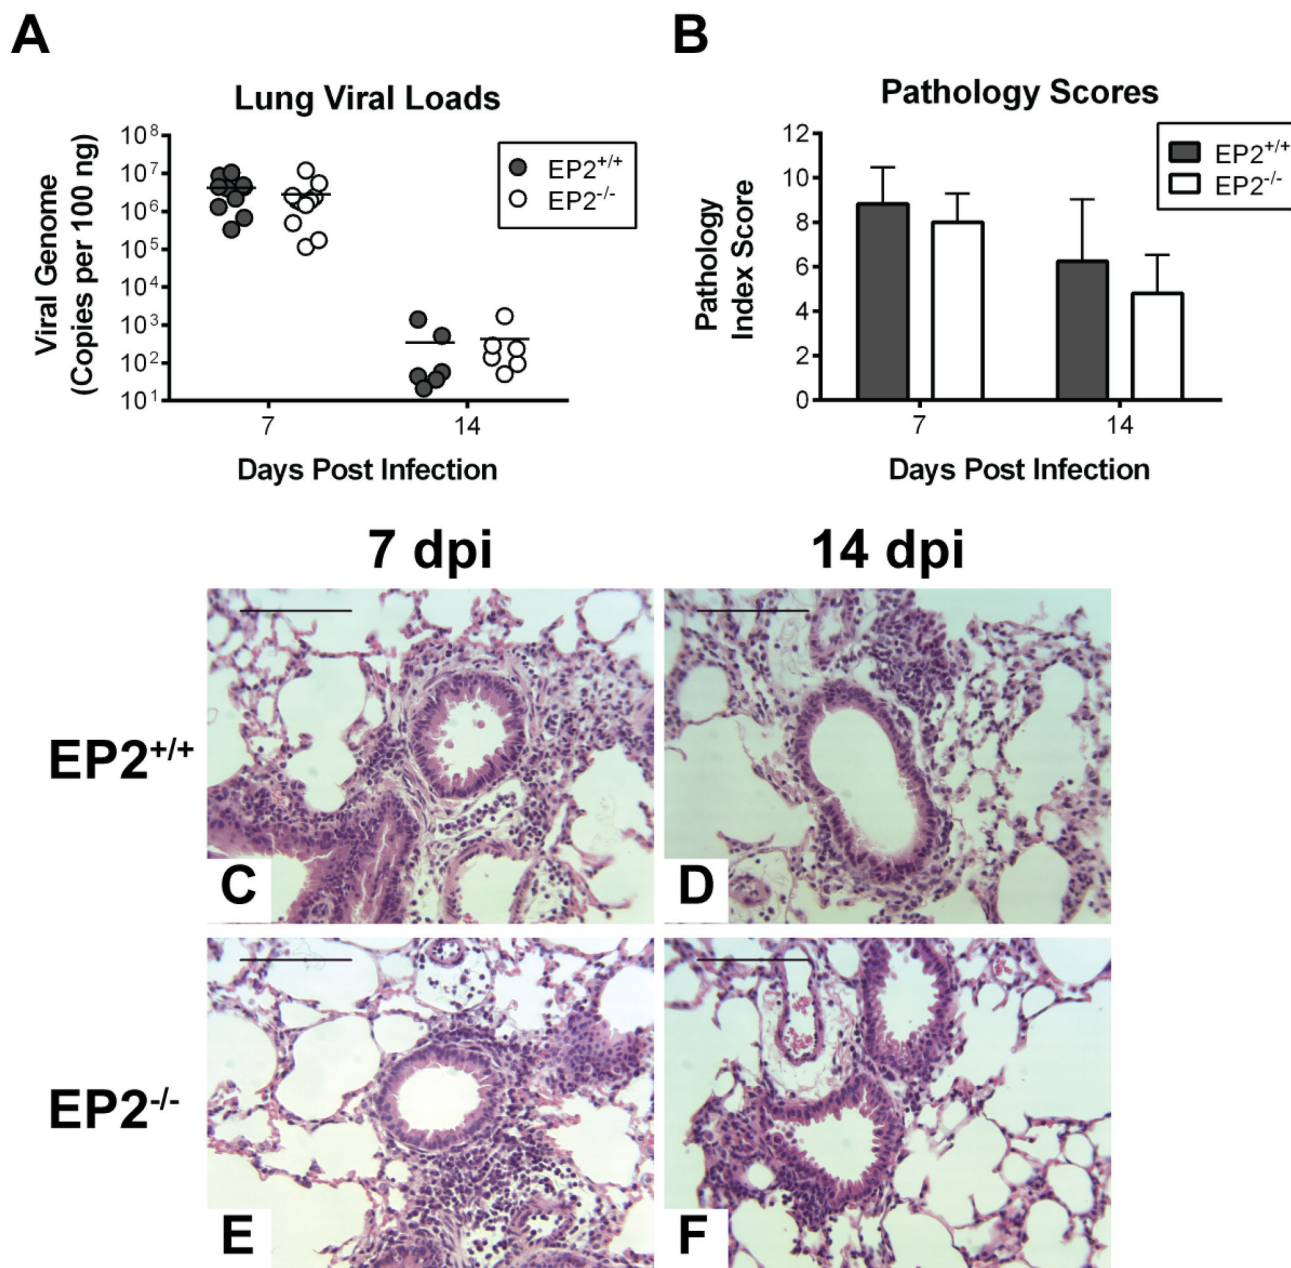

**Figure 2. Effects of EP2 deficiency on MAV-1 respiratory infection.** Mice were infected i.n. with MAV-1. A) DNA was extracted from lungs from EP2<sup>+/+</sup> and EP2<sup>-/-</sup> mice at the indicated time points. qPCR was used to quantify DNA viral loads, which are expressed as copies of MAV-1 genome per 100 ng of input DNA. Individual circles represent values for individual mice and horizontal bars represent means for each group. B) Pathology index scores were generated to quantify cellular inflammation. Combined data from 4 to 6 mice per group are presented as means ± S.E.M. C-F) Hematoxylin and eosin-stained sections were prepared from paraffin-embedded sections (bottom panels). Scale bars, 100 μm.

doi: 10.1371/journal.pone.0077628.g002

baseline by 14 dpi. CCL5 protein induction was also lower in infected mPGES-1<sup>-/-</sup> mice compared to infected mPGES-1<sup>+/+</sup> mice at 7 and 14 dpi, although the difference was only statistically significant at 7 dpi (Figure 3G). At 7 dpi, concentrations of CXCL1 protein in BALF were less in infected

mPGES-1<sup>-/-</sup> mice than in mPGES-1<sup>+/+</sup> mice (Figure 3H). By 14 dpi, CXCL1 decreased to baseline levels in both mPGES-1<sup>+/+</sup> and mPGES-1<sup>-/-</sup> mice.

To determine whether these effects on proinflammatory cytokines and chemokines correlated with changes in other

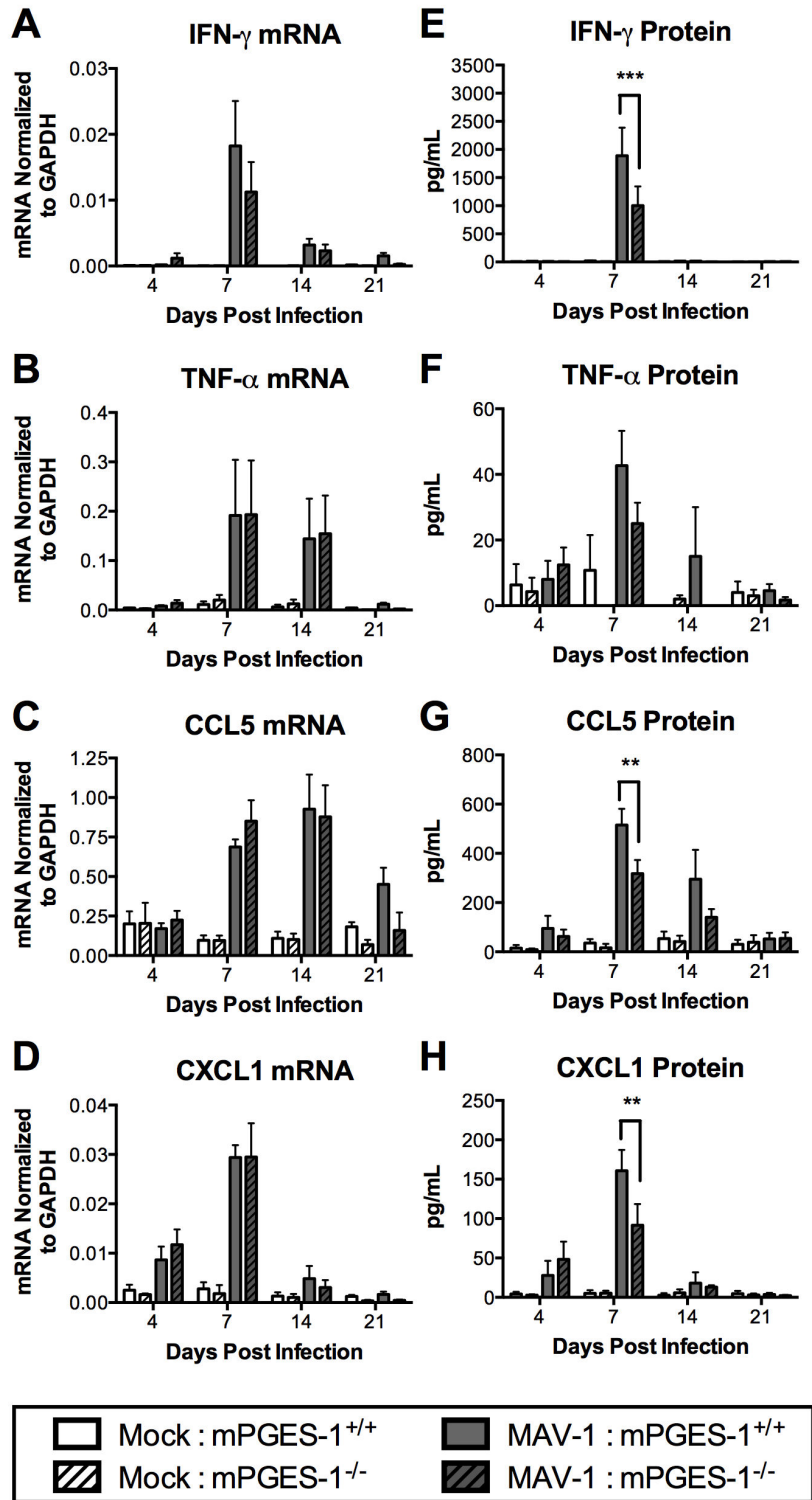

**Figure 3. Effects of mPGES-1 deficiency on MAV-1-induced cytokine production.** mPGES-1<sup>+/+</sup> and mPGES-1<sup>-/-</sup> mice were infected i.n. with MAV-1 or mock infected with conditioned media. A-D) RNA was extracted from lungs harvested at the indicated time points and RT-qPCR was used to quantify cytokine expression, which is shown in arbitrary units. E-H) ELISA was used to quantify cytokine concentrations in BALF at the indicated time points. Combined data from 3 to 5 mice per group are presented as means  $\pm$  S.E.M. Statistical comparisons were made using two-way ANOVA followed by Bonferroni's multiple comparison tests. \*\**P*<0.01.

doi: 10.1371/journal.pone.0077628.g003

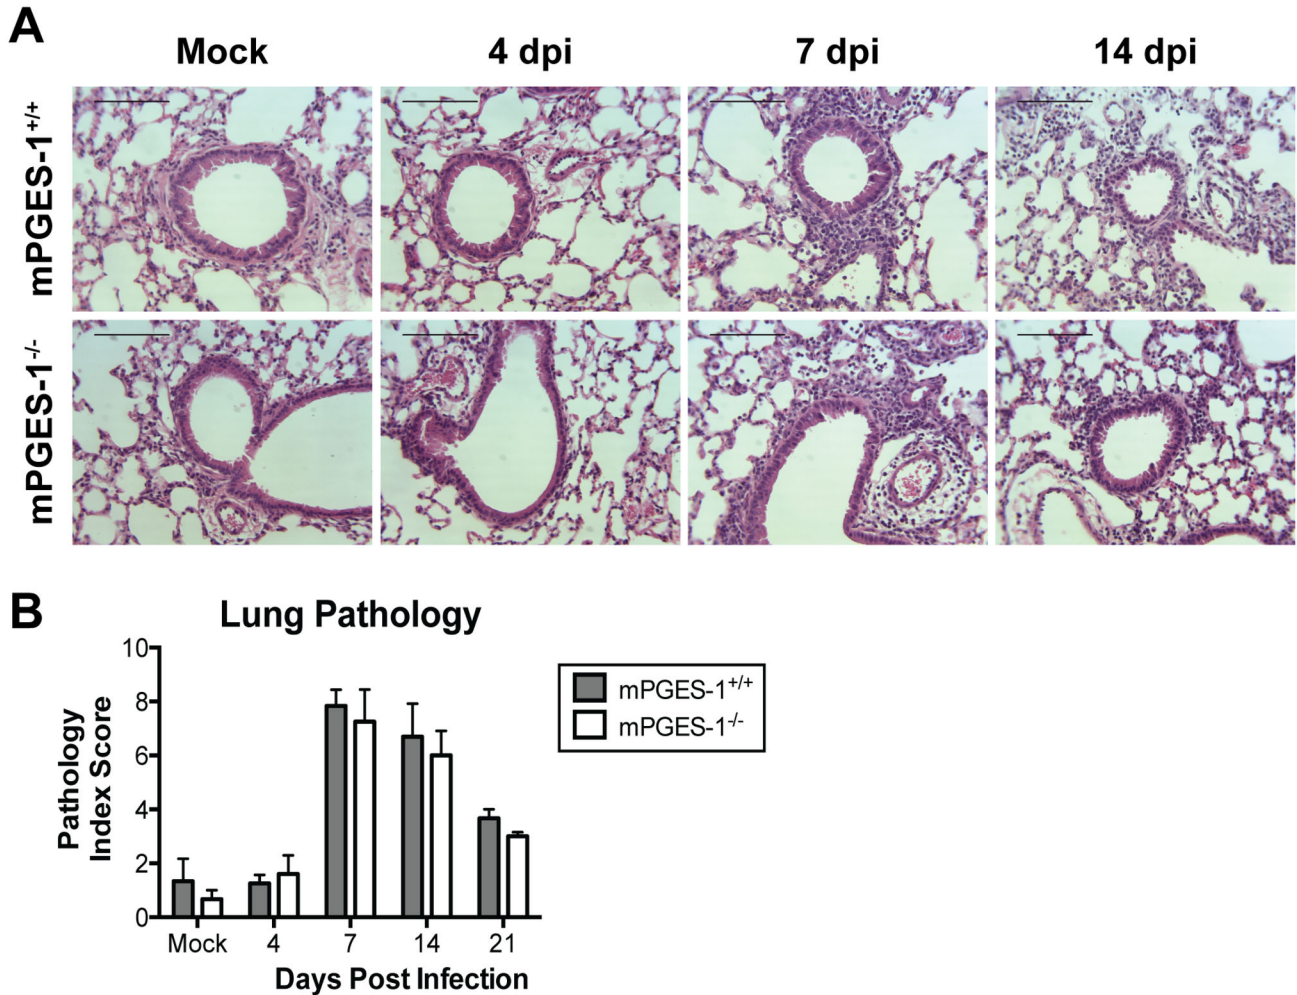

**Figure 4. Effects of mPGES-1 deficiency on MAV-1-induced lung inflammation.** mPGES-1<sup>+/+</sup> and mPGES-1<sup>-/-</sup> mice were infected i.n. with MAV-1 or mock infected with conditioned media. Lungs were harvested at the indicated time points. A) Hematoxylin and eosin-stained sections were prepared from paraffin-embedded sections. Scale bars, 100 μm. B) Pathology index scores were generated to quantify cellular inflammation. Combined data from 3 to 6 mice per group are presented as means ± S.E.M.

doi: 10.1371/journal.pone.0077628.g004

measures of virus-induced lung inflammation, we enumerated leukocytes in BALF obtained from mPGES-1<sup>+/+</sup> and mPGES-1<sup>-/-</sup> mice after infection. There were no statistically significant differences between infected mPGES-1<sup>+/+</sup> and mPGES-1<sup>-/-</sup> mice in the numbers or types of leukocytes in BALF at any time point examined (data not shown). Next, we evaluated MAV-1-induced cellular inflammation in the lungs of mPGES-1<sup>+/+</sup> and mPGES-1<sup>-/-</sup> mice. As we have previously described [34,35], we observed focal areas of inflammation surrounding medium and large airways, accompanied by scattered interstitial infiltrates in both mPGES-1<sup>+/+</sup> and mPGES-1<sup>-/-</sup> mice (Figure 4A). Lung inflammation peaked at 7 dpi and became somewhat less pronounced by 14 dpi. By 21 dpi, cellular inflammation had largely resolved in both mPGES-1<sup>+/+</sup> and mPGES-1<sup>-/-</sup> mice. We used pathology index scores (Table 1) to quantify lung

inflammation. Pathology scores were greater in infected mice than in mock infected controls at 7 and 14 dpi, when inflammation was greatest (Figure 4B). There were no statistically significant differences in pathology index scores measured in mPGES-1<sup>+/+</sup> and mPGES-1<sup>-/-</sup> mice at any time.

It is possible that mPGES-1 deficiency could result in shunting of the COX-derived intermediate PGH<sub>2</sub> to other synthases such as the prostaglandin I<sub>2</sub> (PGI<sub>2</sub>) synthase, leading to increased production of the next most abundant COX pathway product, PGI<sub>2</sub>. Because PGI<sub>2</sub> signaling through the IP receptor also involves increases in intracellular cAMP, PGI<sub>2</sub> overproduction could potentially compensate for PGE<sub>2</sub> deficiency in our model. To determine whether this was the case, we measured concentrations of the PGI<sub>2</sub> metabolite 6-keto-PGF1α in lung homogenates before and after infection.



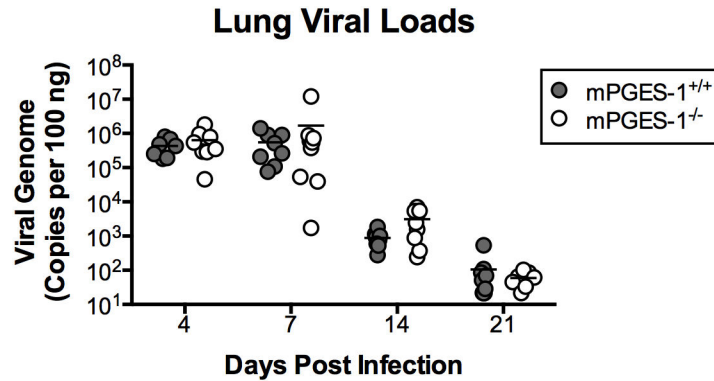

**Figure 5. Effects of mPGES-1 deficiency on MAV-1 viral loads.** mPGES-1<sup>+/+</sup> and mPGES-1<sup>-/-</sup> mice were infected i.n. with MAV-1 or mock infected with conditioned media. DNA was extracted from lungs harvested at the indicated time points. qPCR was used to quantify MAV-1 genome copies in lung DNA. DNA viral loads are expressed as copies of MAV-1 genome per 100 ng of input DNA. Individual circles represent values for individual mice and horizontal bars represent means for each group.

doi: 10.1371/journal.pone.0077628.g005

We observed small but insignificant increases of 6-keto-PGF1 $\alpha$  in both mPGES-1<sup>+/+</sup> and mPGES-1<sup>-/-</sup> mice after infection compared to mock infected mice. However, there were no significant differences between 6-keto-PGF1 $\alpha$  concentrations in mPGES-1<sup>+/+</sup> and mPGES-1<sup>-/-</sup> mice at any time point (data not shown). This suggests that PGI<sub>2</sub> overproduction does not substantially compensate for any effect of PGE<sub>2</sub> deficiency in mPGES-1<sup>-/-</sup> mice infected with MAV-1.

#### Effects of mPGES-1 deficiency on susceptibility to MAV-1

PGE<sub>2</sub> deficiency in mPGES-1<sup>-/-</sup> mice was associated with less production of IFN- $\gamma$  and other cytokines in the airways of infected mice (Figure 3). To determine whether these differences correlated with increased susceptibility to MAV-1 infection, we used qPCR to quantify viral loads in the lungs and other target organs. Virus was detectable in the lungs by 4 dpi, and viral loads peaked at 7 dpi in both mPGES-1<sup>+/+</sup> and mPGES-1<sup>-/-</sup> mice (Figure 5). Lung viral loads decreased substantially in both mPGES-1<sup>+/+</sup> and mPGES-1<sup>-/-</sup> mice at 14 and 21 dpi, consistent with clearance of virus from the lungs in both groups (Figure 5). There were no statistically significant differences in lung viral loads measured in mPGES-1<sup>+/+</sup> mice compared to mPGES-1<sup>-/-</sup> mice at any time point. Likewise, there were no statistically significant differences in viral loads measured in the brains and spleens of mPGES-1<sup>+/+</sup> mice compared to mPGES-1<sup>-/-</sup> mice at any time point (data not shown). Collectively, these data suggest that PGE<sub>2</sub> deficiency does not affect the control of viral replication in the lungs during acute infection, clearance of virus from the lungs, or dissemination of virus to other target organs.

#### Effect of the nonselective COX inhibitor indomethacin on MAV-1 infection

To determine whether COX-derived products other than PGE<sub>2</sub> contribute to MAV-1-induced inflammatory responses, we infected mice i.n. with 10<sup>5</sup> pfu MAV-1 and treated mice daily

with an i.p. injection of indomethacin as previously described [55] and then harvested samples at 7 d.p.i. Indomethacin treatment reduced lung PGE<sub>2</sub> concentrations by approximately 30% in infected mice (data not shown). Unlike our findings in mPGES-1<sup>-/-</sup> mice, treatment of MAV-1-infected mice with indomethacin did not affect virus-induced production of IFN- $\gamma$ , CXCL1, CCL5, or TNF- $\alpha$  (Figure 6A and data not shown). Likewise, indomethacin did not affect the development of lung pathology after MAV-1 infection (Figure 6B) or MAV-1 lung viral loads (Figure 6C).

#### Adaptive immunity to MAV-1 is not substantially affected by PGE<sub>2</sub> deficiency

PGE<sub>2</sub> has a variety of effects on T and B cell function that are likely to affect the development of adaptive immunity and subsequent protection from secondary infection. Because of the various effects of PGE<sub>2</sub> on T and B lymphocyte function, we reasoned that PGE<sub>2</sub> deficiency might inhibit appropriate adaptive immune responses to MAV-1 infection. To examine this, we infected or mock infected mPGES-1<sup>+/+</sup> and mPGES-1<sup>-/-</sup> mice i.n. with 10<sup>5</sup> p.f.u. of MAV-1 and then rechallenged them with virus or conditioned media at 28 dpi. We measured lung viral loads at 7 days after the second challenge, using protection (lower lung viral loads following rechallenge) as a marker of adaptive immune function. Virus was readily detectable in mPGES-1<sup>+/+</sup> mice that were originally mock infected and then infected with virus 28 days later (Figure 7A). mPGES-1<sup>+/+</sup> mice that were initially infected with virus and then rechallenged with virus at 28 dpi had viral loads that were significantly lower than viral loads measured in mice that were initially mock infected and then infected with virus 28 days later (Figure 7A). This suggests that mPGES-1<sup>+/+</sup> mice were capable of generating a protective adaptive immune response. When we rechallenged mPGES-1<sup>-/-</sup> mice, we observed protection equivalent to that observed in mPGES-1<sup>+/+</sup> mice (Figure 7A).

To verify that this experimental design could demonstrate a difference in adaptive immune responses, we performed a similar rechallenge experiment using A $\beta$ <sup>-/-</sup> (MHC II-deficient)

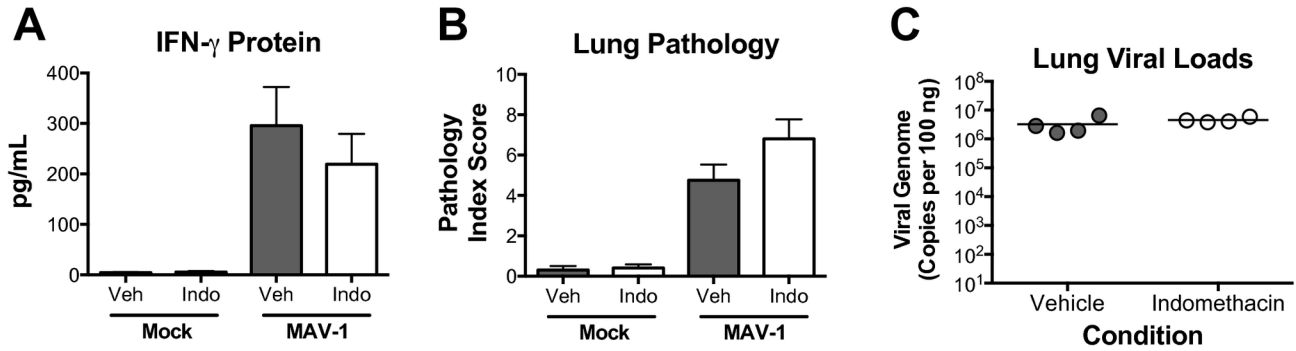

**Figure 6. Effects of COX inhibition on MAV-1 respiratory infection.** Wild type mice were infected i.n. with MAV-1 or mock infected with conditioned media. Mice were treated daily with indomethacin (1.2 mg/kg given i.p.) or vehicle control until samples were harvested at 7 d.p.i. A) ELISA was used to quantify IFN- $\gamma$  concentrations in BALF. Combined data from 4 to 5 mice per group are presented as means  $\pm$  S.E.M. B) Pathology index scores were generated to quantify cellular inflammation in lungs. Combined data from 4 to 5 mice per group are presented as means  $\pm$  S.E.M. C) DNA was extracted from lungs and qPCR was used to quantify MAV-1 genome copies in lung DNA. DNA viral loads are expressed as copies of MAV-1 genome per 100 ng of input DNA. Individual circles represent values for individual mice and horizontal bars represent means for each group.

doi: 10.1371/journal.pone.0077628.g006

mice. Following primary infection, lung viral loads in  $A\beta^{-/-}$  mice were approximately 1 log unit higher than in  $A\beta^{+/+}$  mice at 7 dpi (Figure 7B). While lung viral loads were slightly lower in  $A\beta^{-/-}$  mice rechallenged with virus than in  $A\beta^{-/-}$  mice following primary infection, this difference was substantially less than the corresponding difference in  $A\beta^{+/+}$  mice (Figure 7B). As expected, the data from these rechallenge experiments indicate that MHC II (and thus CD4 T cells) are required for the development of protective immunity to MAV-1. Although subtle effects of PGE<sub>2</sub> deficiency on specific aspects of T or B lymphocyte function remain possible, these data suggest that PGE<sub>2</sub> does not make substantial contributions to adaptive immune responses that are required for protection against MAV-1 respiratory infection.

## Discussion

The expression of COX-2 and production of PGE<sub>2</sub> increases in response to acute respiratory infection with several viruses [21-29]. Previous studies have typically used COX inhibition or COX-deficient animals to study contributions of PGE<sub>2</sub> to viral pathogenesis. Because these strategies affect all COX-derived mediators, specific roles played by PGE<sub>2</sub> during viral respiratory infection remain unclear. In this study, we demonstrate that acute MAV-1 respiratory infection also induces COX-2 expression and PGE<sub>2</sub> production in the lungs. PGE<sub>2</sub> regulates immune function in many ways that could potentially affect viral pathogenesis. Inhibition of PGE<sub>2</sub> production during respiratory viral infection with RSV or influenza leads to decreased pro-inflammatory cytokine production and decreased pulmonary inflammation [22,30]. Based on these previous studies, we hypothesized that PGE<sub>2</sub> coordinates inflammatory responses during adenovirus respiratory infection. Using mPGES-1-deficient mice, we demonstrated that PGE<sub>2</sub> promoted the production of some inflammatory cytokines during MAV-1 infection. However, we

were surprised to find no evidence that PGE<sub>2</sub> regulated viral replication, inflammatory cell accumulation, inflammatory cell composition, or development of protective adaptive immune responses.

Our results differ from what has been observed with other respiratory viruses. For example, inhibition of PGE<sub>2</sub> production during influenza or RSV infection has significant effects on virus-induced inflammatory responses. During influenza infection, treatment of mice with the COX-2 inhibitor celecoxib suppresses virus-induced production of proinflammatory cytokines in the lungs, although it does not affect viral titers or disease severity [54]. Treatment of influenza-infected mice with COX inhibitors results in improved lung function and reduced immunopathology [56]. In our study, treatment with the nonselective COX inhibitor indomethacin did not affect virus-induced lung pathology or cytokine production (Figure 6A-B), despite decreasing PGE<sub>2</sub> levels. This lack of effect again suggest differences between the role of PGE<sub>2</sub> and other COX-derived mediators in MAV-1 pathogenesis compared to other viruses, although it may also reflect an incomplete suppression of PGE<sub>2</sub> production by drug treatment. Genetic COX-2 deficiency has a more pronounced effect on influenza-induced disease than does pharmacologic inhibition, because COX-2<sup>-/-</sup> mice have reduced mortality, inflammation and cytokine responses after influenza infection compared to wild-type control mice [30]. Treatment of RSV-infected airway epithelial cells with the COX-2 inhibitors NS-398 or celecoxib reduces production of virus particles and proinflammatory cytokines *in vitro* [21], although COX inhibition does not appear to significantly affect RSV replication *in vivo*. Similar to the effects of COX inhibition in influenza-infected mice, COX inhibition results in decreased lung pathology in RSV-infected cotton rats [22].

Our results showing reduced production of proinflammatory cytokines after MAV-1 infection of mPGES-1-deficient mice are similar to the effects of COX inhibition during influenza or RSV

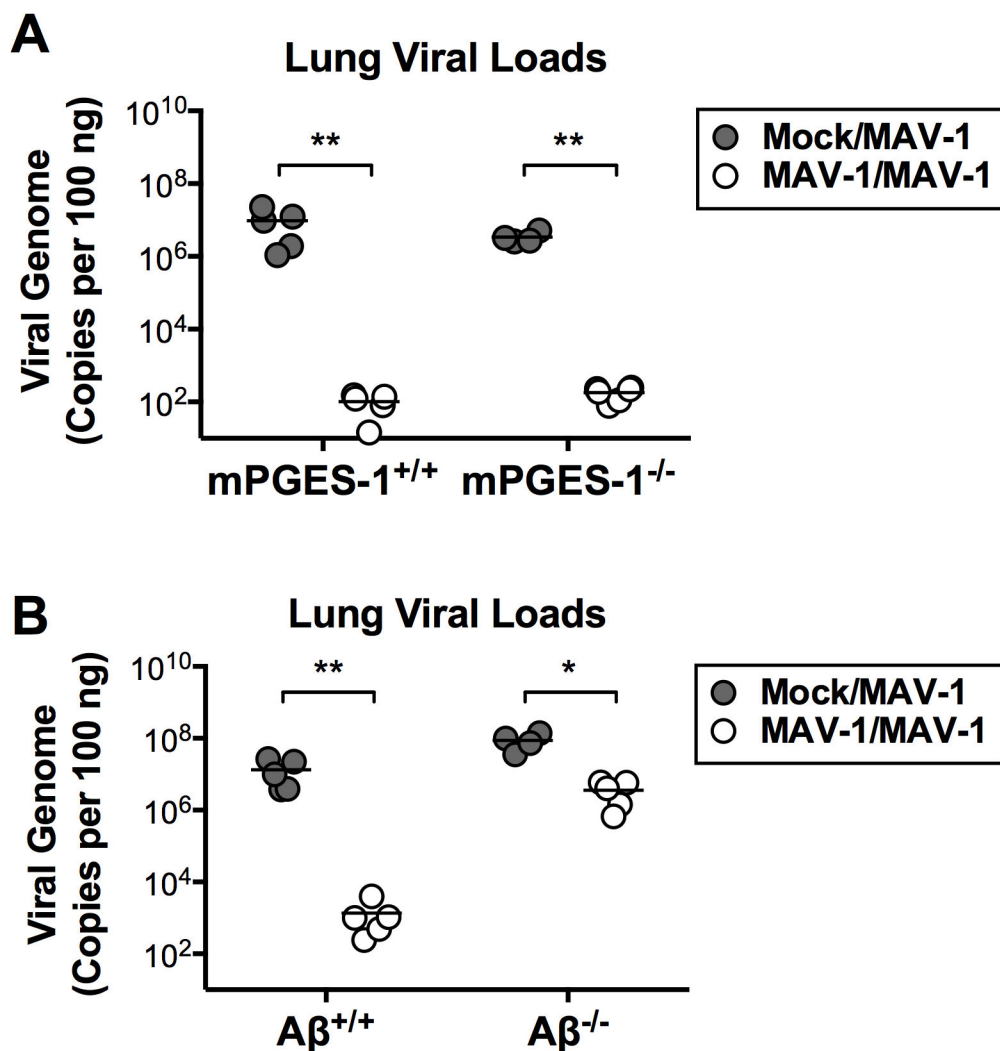

**Figure 7. Protective immunity to MAV-1 infection.** A) mPGES-1<sup>-/-</sup> and B) Aβ<sup>-/-</sup> mice, along with appropriate mPGES-1<sup>+/+</sup> and Aβ<sup>+/+</sup> controls, were infected i.n. with MAV-1 or mock infected with conditioned media. At 28 dpi, mice were re-infected i.n. with MAV-1 and lungs were harvested at 7 dpi. DNA was extracted from lungs and qPCR was used to quantify DNA viral loads, which are expressed as copies of MAV-1 genome per 100 ng of input DNA. Individual circles represent values for individual mice and horizontal bars represent means for each group. Statistical comparisons were made using the Mann-Whitney rank sum test for differences between conditions within a given genotype. \*P<0.05 and \*\*P<0.01.

doi: 10.1371/journal.pone.0077628.g007

infection. This supports a role for PGE<sub>2</sub> in promoting proinflammatory cytokine production in the lung during viral infection. However, unlike studies using COX inhibition during influenza or RSV infection, we did not observe a substantial effect of PGE<sub>2</sub> deficiency on MAV-1-induced lung pathology. This suggests that the effects on lung pathology observed with COX inhibition during influenza or RSV infection could be due to decreased production of another COX-derived eicosanoid such as thromboxane, PGD<sub>2</sub>, PGF<sub>2</sub>, and PGI<sub>2</sub>. Interestingly, levels of PGE<sub>2</sub> in influenza-infected COX-2<sup>-/-</sup> mice are equivalent to levels measured in infected COX-2<sup>+/+</sup> control mice [30], further supporting the possibility that the effects of COX-2 deficiency on influenza pathogenesis may not be solely due to

decreased production of PGE<sub>2</sub>. We typically observe host responses to acute MAV-1 respiratory infection that are generally similar to those seen with RSV and influenza infection. However, RNA viruses such as RSV and influenza are likely to interact with different pattern recognition receptors than a DNA virus such as MAV-1 or the human adenoviruses. It is possible that subtle differences in the mechanisms underlying the induction of inflammatory responses by these viruses, along with differential effects of PGE<sub>2</sub> or other eicosanoids on those responses, could account for differences between our results with MAV-1 and those with RSV and influenza.

We used mice deficient in mPGES-1 to specifically characterize the effects of reduced PGE<sub>2</sub> production on viral replication and host responses to primary MAV-1 infection. Although overproduction of other prostaglandins in the absence of mPGES-1 occurs in some models using mPGES-1-deficient mice [7,53,57,58], we did not detect significant overproduction of PGI<sub>2</sub> metabolites in mPGES-1<sup>-/-</sup> mice at baseline or following infection with MAV-1. Therefore, we do not believe that overproduction of other prostaglandins compensated for PGE<sub>2</sub> deficiency in our experiments, reducing any potential effect on MAV-1 pathogenesis. It is possible that other mediators not measured, such as leukotrienes, could be compensating for PGE<sub>2</sub> deficiency in our model. The use of mPGES-1<sup>-/-</sup> mice instead of pharmacologic inhibition of PGE<sub>2</sub> production allowed us to study the effects of almost complete PGE<sub>2</sub> deficiency. COX or mPGES-1 inhibitors do not achieve complete inhibition of enzymatic activity by COX or mPGES-1, whereas mPGES-1<sup>-/-</sup> mice have a complete loss of mPGES-1 activity and are therefore more completely PGE<sub>2</sub>-deficient [7,53]. It is possible that mice genetically deficient in mPGES-1 could have functional differences in the development of the immune system that we have not defined in our experiments, possibly establishing compensatory pathways to overcome any defects that would have been the result of PGE<sub>2</sub> deficiency.

We have previously demonstrated that MAV-1 induces a Th1 response in the lungs of infected mice, with significant upregulation of IFN-γ that peaks at 7 dpi [35]. Some reports have suggested that PGE<sub>2</sub> promotes a Th2-polarized environment by suppressing production of the Th1 cytokines IFN-γ and IL-12 *in vitro* [12,13]. However, nanomolar concentrations of PGE<sub>2</sub> enhance Th1 cytokine secretion and differentiation *in vivo* [14,15]. We demonstrated less induction of IFN-γ in mPGES-1<sup>-/-</sup> mice infected with MAV-1, supporting the notion that PGE<sub>2</sub> could contribute to an appropriate Th1 response to MAV-1 infection. The decreased IFN-γ response observed in mPGES-1<sup>-/-</sup> mice is likely due to a decrease in IFN-γ production by CD4<sup>+</sup> and CD8<sup>+</sup> T cells, as these cell types are the major producers of IFN-γ during MAV-1 respiratory infection (Mary McCarthy and Jason Weinberg, unpublished data). Viral loads in mPGES-1<sup>-/-</sup> mice did not differ from those of mPGES-1<sup>+/+</sup> mice at 7 dpi despite less induction of IFN-γ in mPGES-1<sup>-/-</sup> mice. We have previously demonstrated that IFN-γ does play some role in the control of viral replication [35], but results from that study and from the present experiments suggest that other factors are likely able to compensate for IFN-γ deficiency to control MAV-1 replication in the lung.

In addition to its contributions to T cell polarization, PGE<sub>2</sub> plays an important role in promoting antibody synthesis and isotype switching [16-20]. Due to the potential effects of PGE<sub>2</sub>

on T cell polarization and B cell antibody responses, we hypothesized that PGE<sub>2</sub> deficiency might inhibit appropriate adaptive immune responses to MAV-1 infection. Total serum IgG levels were similar in mPGES-1<sup>+/+</sup> and mPGES-1<sup>-/-</sup> mice (data not shown), suggesting that total antibody production in response to MAV-1 infection is unaffected by the absence of PGE<sub>2</sub>. It is possible that virus-specific antibody production and virus-specific T cell functions were altered by PGE<sub>2</sub> deficiency. However, the results of our rechallenge experiments, in which both mPGES-1<sup>+/+</sup> and mPGES-1<sup>-/-</sup> mice were protected by prior infection, suggest that PGE<sub>2</sub> is not likely to substantially affect the development of protective immune responses to MAV-1.

COX inhibitors such as acetaminophen and ibuprofen are frequently used to alleviate fever and other symptoms in patients with respiratory infections. Decreases in RSV- and influenza-induced inflammation in animals treated with COX inhibitors or genetically deficient in COX-2 suggest that modulation of virus-induced PGE<sub>2</sub> production may have other benefits for patients with infections caused by some viruses. Our results with MAV-1 infection of PGE<sub>2</sub>-deficient mice suggest that PGE<sub>2</sub> promotes MAV-1-induced cytokine production but does not have a dramatic effect on MAV-1-induced lung inflammation or control of viral replication. A more generalized inhibition of eicosanoids in addition to PGE<sub>2</sub> may be necessary to achieve more pronounced effects on virus-induced inflammatory responses. Ultimately, this may provide an attractive approach to limiting damage caused by virus-induced inflammation without having a substantial effect on the control of viral infection by host immune responses.

## Acknowledgements

We thank Katherine Spindler, Michael Imperiale, Marc Petersgolden and Bethany Moore for helpful review of the manuscript. We appreciate the assistance of Joel Whitfield with ELISA measurements, which were performed by the University of Michigan Cancer Center Core, and the help of Paula Arrowsmith with histology, which was performed in the Pathology Cores for Animal Research in the University of Michigan Unit for Laboratory Management.

## Author Contributions

Conceived and designed the experiments: MKM PM LJC DMA JBW. Performed the experiments: MKM REL MCP PJM LZ JBW. Analyzed the data: MKM REL MCP JBW. Contributed reagents/materials/analysis tools: LJC. Wrote the manuscript: MKM JBW.

## References

1. Tanikawa N, Ohmiya Y, Ohkubo H, Hashimoto K, Kangawa K et al. (2002) Identification and characterization of a novel type of membrane-associated prostaglandin E synthase. *Biochem Biophys Res Commun* 291: 884-889. doi:10.1006/bbrc.2002.6531. PubMed: 11866447.
2. Tanioka T, Nakatani Y, Semmyo N, Murakami M, Kudo I (2000) Molecular identification of cytosolic prostaglandin E2 synthase that is functionally coupled with cyclooxygenase-1 in immediate prostaglandin E2 biosynthesis. *J Biol Chem* 275: 32775-32782. doi:10.1074/jbc.M003504200. PubMed: 10922363.
3. Jakobsson PJ, Thorén S, Morgenstern R, Samuelsson B (1999) Identification of human prostaglandin E synthase: a microsomal, glutathione-dependent, inducible enzyme, constituting a potential novel drug target. *Proc Natl Acad Sci USA* 96: 7220-7225. doi:10.1073/pnas.96.13.7220. PubMed: 10377395.
4. Jania LA, Chandrasekharan S, Backlund MG, Foley NA, Snouwaert J et al. (2009) Microsomal prostaglandin E synthase-2 is not essential for *in vivo* prostaglandin E2 biosynthesis. *Prostaglandins Other Lipid*

- Mediat 88: 73-81. doi:10.1016/j.prostaglandins.2008.10.003. PubMed: 19010439.
5. Lovgren AK, Kovarova M, Koller BH (2007) cPGES/p23 is required for glucocorticoid receptor function and embryonic growth but not prostaglandin E2 synthesis. *Mol Cell Biol* 27: 4416-4430. doi:10.1128/MCB.02314-06. PubMed: 17438133.
  6. Trebino CE, Stock JL, Gibbons CP, Naiman BM, Wachtmann TS et al. (2003) Impaired inflammatory and pain responses in mice lacking an inducible prostaglandin E synthase. *Proc Natl Acad Sci USA* 100: 9044-9049. doi:10.1073/pnas.1332766100. PubMed: 12835414.
  7. Boulet L, Ouellet M, Bateman KP, Ethier D, Percival MD et al. (2004) Deletion of microsomal prostaglandin E2 (PGE2) synthase-1 reduces inducible and basal PGE2 production and alters the gastric prostanoid profile. *J Biol Chem* 279: 23229-23237. doi:10.1074/jbc.M400443200. PubMed: 15016822.
  8. Murakami M, Naraba H, Tanioka T, Semmyo N, Nakatani Y et al. (2000) Regulation of prostaglandin E2 biosynthesis by inducible membrane-associated prostaglandin E2 synthase that acts in concert with cyclooxygenase-2. *J Biol Chem* 275: 32783-32792. doi:10.1074/jbc.M003505200. PubMed: 10869354.
  9. McCarthy MK, Weinberg JB (2012) Eicosanoids and Respiratory Viral Infection: Coordinators of Inflammation and Potential Therapeutic Targets. *Mediators Inflamm*, 2012: 2012: 1-13 PubMed: 22665949.
  10. McCoy JM, Wicks JR, Audoly LP (2002) The role of prostaglandin E2 receptors in the pathogenesis of rheumatoid arthritis. *J Clin Invest* 110: 651-658. doi:10.1172/JCI0215528. PubMed: 12208866.
  11. Tavakoli S, Cowan MJ, Benfield T, Logun C, Shelhamer JH (2001) Prostaglandin E(2)-induced interleukin-6 release by a human airway epithelial cell line. *Am J Physiol Lung Cell Mol Physiol* 280: L127-L133. PubMed: 11133502.
  12. Betz M, Fox BS (1991) Prostaglandin E2 inhibits production of Th1 lymphokines but not of Th2 lymphokines. *J Immunol* 146: 108-113. PubMed: 1845802.
  13. Snijdewint FG, Kaliński P, Wierenga EA, Bos JD, Kapsenberg ML (1993) Prostaglandin E2 differentially modulates cytokine secretion profiles of human T helper lymphocytes. *J Immunol* 150: 5321-5329. PubMed: 8390534.
  14. Bloom D, Jabrane-Ferrat N, Zeng L, Wu A, Li L et al. (1999) Prostaglandin E2 enhancement of interferon-gamma production by antigen-stimulated type 1 helper T cells. *Cell Immunol* 194: 21-27. doi:10.1006/cimm.1999.1479. PubMed: 10357877.
  15. Yao C, Sakata D, Esaki Y, Li Y, Matsuoka T et al. (2009) Prostaglandin E2-EP4 signaling promotes immune inflammation through Th1 cell differentiation and Th17 cell expansion. *Nat Med* 15: 633-640. doi:10.1038/nm.1968. PubMed: 19465928.
  16. Bancos S, Bernard MP, Topham DJ, Phipps RP (2009) Ibuprofen and other widely used non-steroidal anti-inflammatory drugs inhibit antibody production in human cells. *Cell Immunol* 258: 18-28. doi:10.1016/j.cellimm.2009.03.007. PubMed: 19345936.
  17. Ryan EP, Pollock SJ, Pollack SJ, Murrant TI, Bernstein SH et al. (2005) Activated human B lymphocytes express cyclooxygenase-2 and cyclooxygenase inhibitors attenuate antibody production. *J Immunol* 174: 2619-2626. PubMed: 15728468.
  18. Roper RL, Brown DM, Phipps RP (1995) Prostaglandin E2 promotes B lymphocyte Ig isotype switching to IgE. *J Immunol* 154: 162-170. PubMed: 7995935.
  19. Fedyk ER, Phipps RP (1996) Prostaglandin E2 receptors of the EP2 and EP4 subtypes regulate activation and differentiation of mouse B lymphocytes to IgE-secreting cells. *Proc Natl Acad Sci U\_S\_A* 93: 10978-10983. doi:10.1073/pnas.93.20.10978. PubMed: 8855294.
  20. Roper RL, Graf B, Phipps RP (2002) Prostaglandin E2 and cAMP promote B lymphocyte class switching to IgG1. *Immunol Lett* 84: 191-198. doi:10.1016/S0165-2478(02)00185-2. PubMed: 12413736.
  21. Liu T, Zaman W, Kaphalia BS, Ansari GAS, Garofalo RP et al. (2005) RSV-induced prostaglandin E2 production occurs via cPLA2 activation: role in viral replication. *Virology* 343: 12-24. doi:10.1016/j.virol.2005.08.012. PubMed: 16153673.
  22. Richardson JY, Ottolini MG, Pletneva L, Boukhvalova M, Zhang S et al. (2005) Respiratory syncytial virus (RSV) infection induces cyclooxygenase 2: a potential target for RSV therapy. *J Immunol* 174: 4356-4364. PubMed: 15778400.
  23. Radi ZA, Meyerholz DK, Ackermann MR (2010) Pulmonary cyclooxygenase-1 (COX-1) and COX-2 cellular expression and distribution after respiratory syncytial virus and parainfluenza virus infection. *Viral Immunol* 23: 43-48. doi:10.1089/vim.2009.0042. PubMed: 20121401.
  24. Sznajder Y, Westcott JY, Wenzel SE, Mazer B, Tucci M et al. (2004) Airway eicosanoids in acute severe respiratory syncytial virus bronchiolitis. *J Pediatr* 145: 115-118. doi:10.1016/j.jpeds.2004.03.049. PubMed: 15238918.
  25. Lee SM, Cheung CY, Nicholls JM, Hui KP, Leung CY et al. (2008) Hyperinduction of Cyclooxygenase-2-Mediated Proinflammatory Cascade: A Mechanism for the Pathogenesis of Avian Influenza H5N1 Infection. *J Infect Dis* 198: 525-535. doi:10.1086/590499. PubMed: 18613795.
  26. Woo PC, Tung ET, Chan K-H, Lau CCL, Lau Sal Ket. (2010) Cytokine profiles induced by the novel swine-origin influenza A/H1N1 virus: implications for treatment strategies. *J Infect Dis* 201: 346-353. doi:10.1086/649785. PubMed: 20030555.
  27. Darwish I, Mubareka S, Liles WC (2011) Immunomodulatory therapy for severe influenza. *Expert Rev Anti Infect Ther* 9: 807-822. doi:10.1586/eri.11.56. PubMed: 21810053.
  28. Zhu H, Cong J-P, Yu D, Bresnahan WA, Shenk TE (2002) Inhibition of cyclooxygenase 2 blocks human cytomegalovirus replication. *Proc Natl Acad Sci U\_S\_A* 99: 3932-3937. doi:10.1073/pnas.052713799. PubMed: 11867761.
  29. Seymour ML, Gilby N, Bardin PG, Fraenkel DJ, Sanderson G et al. (2002) Rhinovirus infection increases 5-lipoxygenase and cyclooxygenase-2 in bronchial biopsy specimens from nonatopic subjects. *J Infect Dis* 185: 540-544. doi:10.1086/338570. PubMed: 11865407.
  30. Carey MA, Bradbury JA, Seubert JM, Langenbach R, Zeldin DC et al. (2005) Contrasting effects of cyclooxygenase-1 (COX-1) and COX-2 deficiency on the host response to influenza A viral infection. *J Immunol* 175: 6878-6884. PubMed: 16272346.
  31. Knipe D, Howley P, Griffin D, Lamb R, Martin M et al. (2007) Adenoviridae: The Viruses and Their Replication. *Fields Virology*: 2355-2436.
  32. Culver CA, Laster SM (2007) Adenovirus type 5 exerts multiple effects on the expression and activity of cytosolic phospholipase A2, cyclooxygenase-2, and prostaglandin synthesis. *J Immunol* 179: 4170-4179. PubMed: 17785856.
  33. Crofford LJ, McDonagh KT, Guo S, Mehta H, Bian H et al. (2005) Adenovirus binding to cultured synoviocytes triggers signaling through MAPK pathways and induces expression of cyclooxygenase-2. *J Gene Med* 7: 288-296. doi:10.1002/jgm.661. PubMed: 15515144.
  34. Weinberg JB, Stempfle GS, Wilkinson JE, Younger JG, Spindler KR (2005) Acute respiratory infection with mouse adenovirus type 1. *Virology* 340: 245-254. doi:10.1016/j.virol.2005.06.021. PubMed: 16054189.
  35. Procario MC, Levine RE, McCarthy MK, Kim E, Zhu L et al. (2012) Susceptibility to acute mouse adenovirus type 1 respiratory infection and establishment of protective immunity in neonatal mice. *J Virol* 86: 4194-4203. doi:10.1128/JVI.06967-11. PubMed: 22345470.
  36. Weinberg JB, Lutzke ML, Efstathiou S, Kunkel SL, Rochford R (2002) Elevated chemokine responses are maintained in lungs after clearance of viral infection. *J Virol* 76: 10518-10523. doi:10.1128/JVI.76.20.10518-10523.2002. PubMed: 12239330.
  37. Anderson VE, Nguyen Y, Weinberg JB (2009) Effects of allergic airway disease on mouse adenovirus type 1 respiratory infection. *Virology* 391: 25-32. doi:10.1016/j.virol.2009.06.009. PubMed: 19564030.
  38. Nguyen Y, McGuffie BA, Anderson VE, Weinberg JB (2008) Gammaherpesvirus modulation of mouse adenovirus type 1 pathogenesis. *Virology* 380: 182-190. doi:10.1016/j.virol.2008.07.031. PubMed: 18768196.
  39. Weinberg JB, Jensen DR, Gralinski LE, Lake AR, Stempfle GS et al. (2007) Contributions of E1A to mouse adenovirus type 1 pathogenesis following intranasal inoculation. *Virology* 357: 54-67. doi:10.1016/j.virol.2006.08.013. PubMed: 16962154.
  40. Nguyen Y, Procario MC, Ashley SL, O'Neal WK, Pickles RJ et al. (2011) Limited effects of Muc1 deficiency on mouse adenovirus type 1 respiratory infection. *Virus Res* 160: 351-359. doi:10.1016/j.virusres.2011.07.012. PubMed: 21816184.
  41. Moore ML, McKissic EL, Brown CC, Wilkinson JE, Spindler KR (2004) Fatal disseminated mouse adenovirus type 1 infection in mice lacking B cells or Bruton's tyrosine kinase. *J Virol* 78: 5584-5590. doi:10.1128/JVI.78.11.5584-5590.2004. PubMed: 15140955.
  42. Grusby MJ, Johnson RS, Papaioannou VE, Glimcher LH (1991) Depletion of CD4+ T cells in major histocompatibility complex class II-deficient mice. *Science* 253: 1417-1420. doi:10.1126/science.1910207. PubMed: 1910207.
  43. Cauthen AN, Welton AR, Spindler KR (2007) Construction of mouse adenovirus type 1 mutants. *Methods Mol Med* 130: 41-59. PubMed: 17401163.
  44. Steer SA, Corbett JA (2003) The role and regulation of COX-2 during viral infection. *Viral Immunol* 16: 447-460. doi:10.1089/088282403771926283. PubMed: 14733733.

45. Natarajan G, Glibetic M, Raykova V, Ofenstein JP, Thomas RL et al. (2007) Nitric oxide and prostaglandin response to group B streptococcal infection in the lung. *Ann Clin Lab Sci* 37: 170-176. PubMed: 17522374.
46. Xu F, Xu Z, Zhang R, Wu Z, Lim J-H et al. (2008) Nontypeable *Haemophilus influenzae* induces COX-2 and PGE<sub>2</sub> expression in lung epithelial cells via activation of p38 MAPK and NF-kappa B. *Respir Res* 9: 16. doi:10.1186/1465-9921-9-16. PubMed: 18237405.
47. Sadikot RT, Zeng H, Azim AC, Joo M, Dey SK et al. (2007) Bacterial clearance of *Pseudomonas aeruginosa* is enhanced by the inhibition of COX-2. *Eur J Immunol* 37: 1001-1009. doi:10.1002/eji.200636636. PubMed: 17330822.
48. Rangel Moreno J, Estrada García I, De La Luz García Hernández M, Aguilar Leon D, Marquez R et al. (2002) The role of prostaglandin E<sub>2</sub> in the immunopathogenesis of experimental pulmonary tuberculosis. *Immunology* 106: 257-266. doi:10.1046/j.1365-2567.2002.01403.x. PubMed: 12047755. doi:10.1046/j.1365-2567.2002.01403.x PubMed: 12047755
49. Aronoff DM, Bergin IL, Lewis C, Goel D, O'brien E et al. (2012) E-prostanoid 2 receptor signaling suppresses lung innate immunity against *Streptococcus pneumoniae*. *Prostaglandins Other Lipid Mediat* 98: 23-30. doi:10.1016/j.prostaglandins.2012.03.002. PubMed: 22575745.
50. Aronoff DM, Canetti C, Peters-Golden M (2004) Prostaglandin E<sub>2</sub> inhibits alveolar macrophage phagocytosis through an E-prostanoid 2 receptor-mediated increase in intracellular cyclic AMP. *J Immunol* 173: 559-565. PubMed: 15210817.
51. Serezani CH, Chung J, Ballinger MN, Moore BB, Aronoff DM et al. (2007) Prostaglandin E<sub>2</sub> suppresses bacterial killing in alveolar macrophages by inhibiting NADPH oxidase. *Am J Respir Cell Mol Biol* 37: 562-570. doi:10.1165/rcmb.2007-0153OC. PubMed: 17585108.
52. Serezani CH, Ballinger MN, Aronoff DM, Peters-Golden M (2008) Cyclic AMP: master regulator of innate immune cell function. *Am J Respir Cell Mol Biol* 39: 127-132. doi:10.1165/rcmb.2008-0091TR. PubMed: 18323530.
53. Kapoor M, Kojima F, Qian M, Yang L, Crofford LJ (2006) Shunting of prostanoid biosynthesis in microsomal prostaglandin E synthase-1 null embryo fibroblasts: regulatory effects on inducible nitric oxide synthase expression and nitrite synthesis. *FASEB J* 20: 2387-2389. doi: 10.1096/fj.06-6366fje. PubMed: 17023389.
54. Carey MA, Bradbury JA, Reboloso YD, Graves JP, Zeldin DC et al. (2010) Pharmacologic inhibition of COX-1 and COX-2 in influenza A viral infection in mice. *PLOS ONE* 5: e11610. doi:10.1371/journal.pone.0011610. PubMed: 20657653.
55. Coomes SM, Wilke CA, Moore TA, Moore BB (2010) Induction of TGF-beta 1, not regulatory T cells, impairs antiviral immunity in the lung following bone marrow transplant. *J Immunol* 184: 5130-5140. doi: 10.4049/jimmunol.0901871. PubMed: 20348421.
56. Lauder SN, Taylor PR, Clark SR, Evans RL, Hindley JP et al. (2011) Paracetamol reduces influenza-induced immunopathology in a mouse model of infection without compromising virus clearance or the generation of protective immunity. *Thorax* 66: 368-374. doi:10.1136/thx.2010.150318. PubMed: 21310755.
57. Monrad SU, Kojima F, Kapoor M, Kuan EL, Sarkar S et al. (2011) Genetic deletion of mPGES-1 abolishes PGE<sub>2</sub> production in murine dendritic cells and alters the cytokine profile, but does not affect maturation or migration. *Prostaglandins Leukot Essent Fatty Acids* 84: 113-121. doi:10.1016/j.plefa.2010.10.003. PubMed: 21190819.
58. Wang M, Zukas AM, Hui Y, Ricciotti E, Puré E et al. (2006) Deletion of microsomal prostaglandin E synthase-1 augments prostacyclin and retards atherogenesis. *Proc Natl Acad Sci U\_S\_A* 103: 14507-14512. doi:10.1073/pnas.0606586103. PubMed: 16973753.
